# Supplementary material
Source: PubMed Central journal article supplement (PMC4788325)

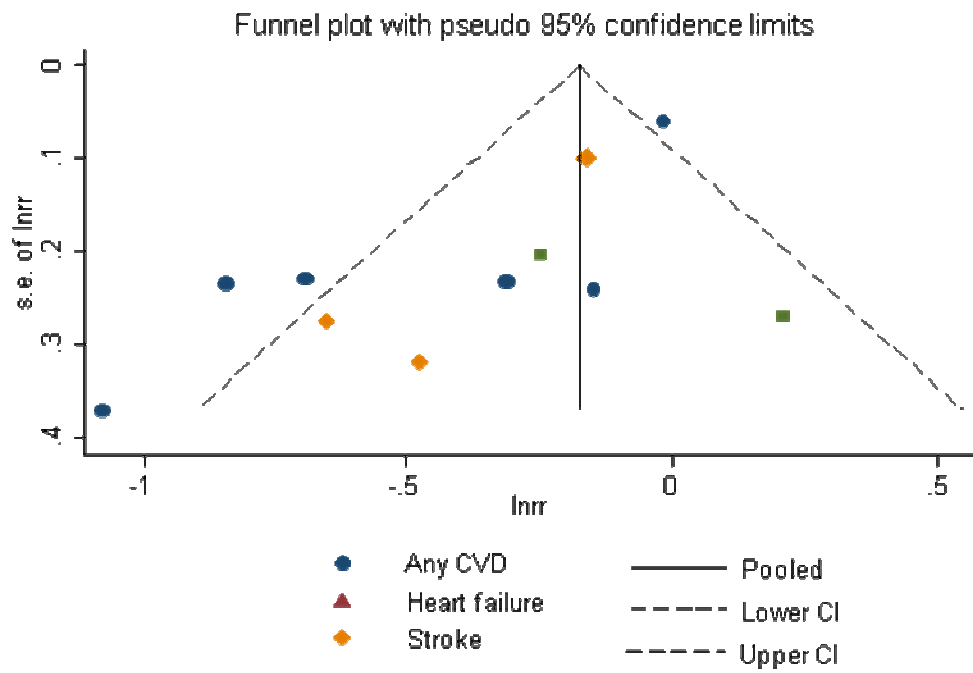

**Supplementary figure 1.** Funnel plot with 95% confidence limits.

Supplement: buia851329.w1_default.pdf [file buia851329.w1_default.pdf]
